# Supplementary material
Source: publisher site journal article supplement (https://www.dovepress.com/article/250792)
Supplement: Supplementary file 1 [file get_supplementary_file.php]

**Table S1. 284 overlapped DEGs.**

| <b>Up-regulated genes</b> | <b>Down-regulated genes</b> |
|---------------------------|-----------------------------|
| ADM                       | ABAT                        |
| ANLN                      | ABLIM1                      |
| ARL4C                     | ACAD8                       |
| ASF1B                     | ACADL                       |
| AURKA                     | ACADSB                      |
| AVEN                      | ADCY9                       |
| BLM                       | ADD3                        |
| BUB1                      | ANK2                        |
| BUB1B                     | ARG2                        |
| CA12                      | ARHGAP6                     |
| CCNA2                     | ARL4D                       |
| CCNB2                     | ASS1                        |
| CD86                      | BBS1                        |
| CDC6                      | BCL2                        |
| CDC7                      | BDH2                        |
| CDCA8                     | BEX1                        |
| CDH13                     | BMP7                        |
| CENPE                     | BSPRY                       |
| CENPF                     | CBX7                        |
| CENPI                     | CCL28                       |
| CEP55                     | CD9                         |
| CHSY1                     | CDH1                        |
| CKS2                      | CDKL2                       |
| COL5A1                    | CDS1                        |
| CTSC                      | CHKA                        |
| DKK1                      | CIRBP                       |
| DNM1                      | CLN5                        |
| DNMT1                     | CLUL1                       |
| DTL                       | CMTM4                       |
| ELF4                      | CRABP1                      |
| ENO1                      | CROT                        |
| ESM1                      | CXADR                       |
| ESPL1                     | CYBRD1                      |
| EZH2                      | CYP7B1                      |
| F2R                       | DAPK2                       |
| FAM83D                    | DIO1                        |
| FANCA                     | DMXL1                       |

|          |          |
|----------|----------|
| FCGR2A   | DPP6     |
| FEN1     | DPT      |
| FN1      | DZIP3    |
| FOXM1    | EDN3     |
| GARS     | ENOSF1   |
| GGH      | EPB41L4B |
| GLRX     | EPHB1    |
| GNA15    | EPM2AIP1 |
| HAPLN1   | ERLIN2   |
| HELLS    | EXOC6    |
| HMMR     | FAAH     |
| HMOX1    | FBXL3    |
| HOXB6    | FGFR2    |
| HPSE     | FMOD     |
| IL1RAP   | FOS      |
| IRAK1    | GFRA2    |
| ITGB5    | GNAL     |
| KCNN4    | GPD1L    |
| KIAA0101 | GPM6A    |
| KIF11    | GPRC5C   |
| KIF14    | HDHD2    |
| KIF23    | HGD      |
| KIF2C    | HHEX     |
| LAIR1    | HSD17B6  |
| LCP2     | INTS10   |
| LGALS1   | IRS1     |
| LMNB2    | ITPR1    |
| LOXL2    | IVD      |
| LTBP1    | KCNAB1   |
| MAD2L1   | KCNJ15   |
| MAP4K4   | KIAA1217 |
| MCM4     | KIAA1324 |
| MCM6     | KIT      |
| MICAL2   | KLHDC8B  |
| MKI67    | LMOD1    |
| MMP12    | LRP1B    |
| MTHFD2   | LRP2     |
| NCAPH    | LRRN3    |
| NDC80    | MAGI1    |
| NEK2     | MAL      |
| NEK6     | MAL2     |
| NUSAP1   | MAN1C1   |
| PBK      | MAOA     |

|          |          |
|----------|----------|
| PLAUR    | MAP7     |
| PLOD1    | MDM1     |
| PLP2     | METTTL7A |
| POLE2    | MLLT3    |
| PRC1     | MMRN1    |
| PROCR    | MTCH1    |
| RAD51    | MYLIP    |
| RAD54L   | MYO5C    |
| RAI14    | MYOC     |
| S100A11  | NDUFA5   |
| SACS     | NEBL     |
| SCD      | NELL2    |
| SERPINE1 | NFIA     |
| SERPINH1 | NT5DC1   |
| SFXN3    | NTRK2    |
| SHMT2    | OBSL1    |
| SLC16A1  | OCA2     |
| SLC1A5   | OMD      |
| SLC2A1   | PAX8     |
| SLC4A7   | PBX1     |
| SLC7A5   | PCP4     |
| SMC4     | PCYOX1   |
| SRM      | PDE1A    |
| STMN1    | PEBP1    |
| TIMP1    | PLA2R1   |
| TMEM51   | PLCH1    |
| TNFSF4   | PLEKHH1  |
| TPX2     | PLLP     |
| TREM1    | POLI     |
| TREM2    | PPARGC1A |
| TRIP13   | PPFIBP2  |
| TTK      | PPP1R13B |
| TYMS     | PREPL    |
| UBE2C    | PRKCQ    |
| UBE2S    | PROX1    |
| UBE2T    | RALGPS1  |
| UGCG     | RAPGEF3  |
| UHRF1    | RGN      |
| UPP1     | RORC     |
| WDHD1    | RUFY3    |
| ZWILCH   | RYR2     |
|          | SALL2    |
|          | SCPEP1   |

|  |               |
|--|---------------|
|  | SDC2          |
|  | SELENBP1      |
|  | SGCD          |
|  | SH3BGRL2      |
|  | SHANK2        |
|  | SLC1A1        |
|  | SLC26A4       |
|  | SLC4A4        |
|  | SLCO2A1       |
|  | SLIT3         |
|  | SMOC2         |
|  | SNTB1         |
|  | SNURF///SNRPN |
|  | SNX4          |
|  | SORBS2        |
|  | SPINT2        |
|  | SSBP2         |
|  | SULT1C2       |
|  | TBC1D4        |
|  | TDRD9         |
|  | TFCP2L1       |
|  | TFF3          |
|  | TM7SF2        |
|  | TMED4         |
|  | TMEM27        |
|  | TMEM30B       |
|  | TOB1          |
|  | TPMT          |
|  | TRIB1         |
|  | TSPAN1        |
|  | TTC30A        |
|  | UNC5C         |
|  | UST           |
|  | VSIG2         |
|  | XPA           |
|  | ZNF135        |
|  | ZNF254        |
|  | ZNF44         |
|  | ZNF536        |
|  | ZNF91         |

**Table S2. 50 hub genes**

| Gene/logFC | GSE9115   | GSE29265 | GSE33630  | GSE53072  | GSE65144  |
|------------|-----------|----------|-----------|-----------|-----------|
| ANLN       | 4.249501  | 3.586486 | 4.5310279 | 4.5112437 | 3.8349291 |
| ASF1B      | 1.731463  | 1.069791 | 1.5568269 | 2.5955777 | 1.37685   |
| AURKA      | 2.486107  | 2.003158 | 2.1283003 | 3.1507348 | 2.3053874 |
| BLM        | 1.544973  | 1.338236 | 1.4803289 | 2.0387852 | 1.4703683 |
| BUB1       | 4.166422  | 1.714786 | 1.4445203 | 3.722185  | 2.1383404 |
| BUB1B      | 3.204029  | 3.662895 | 3.3222085 | 2.7242366 | 2.6633887 |
| CCNA2      | 2.281094  | 2.402771 | 2.5566741 | 3.6408431 | 2.4453877 |
| CCNB2      | 2.631069  | 3.022442 | 1.627931  | 3.1989046 | 2.8048965 |
| CDC6       | 2.834243  | 2.146476 | 2.2222622 | 3.3885052 | 2.1507279 |
| CDCA8      | 1.979445  | 1.430122 | 1.4808024 | 1.9921946 | 1.6368409 |
| CENPE      | 3.00808   | 1.567566 | 2.8211352 | 3.4042924 | 2.7502676 |
| CENPF      | 2.9567997 | 2.782508 | 2.2863712 | 3.9466146 | 2.4685136 |
| CEP55      | 4.628617  | 3.965919 | 3.8667539 | 3.6555611 | 3.3066677 |
| CKS2       | 2.8608215 | 3.022551 | 2.789164  | 3.048534  | 2.1129076 |
| DTL        | 2.576828  | 2.292387 | 2.5118814 | 2.4307324 | 2.1421259 |
| ESPL1      | 1.466805  | 1.207385 | 1.4046968 | 1.564921  | 1.9361152 |
| EZH2       | 1.660323  | 2.370737 | 2.9053579 | 2.456863  | 2.3742056 |
| FAM83D     | 2.739142  | 2.802078 | 3.7329583 | 2.9453276 | 2.6111049 |
| FEN1       | 1.141809  | 1.351084 | 1.7638414 | 1.163661  | 1.5123178 |
| FOXM1      | 1.557227  | 2.838813 | 2.6943389 | 3.4934012 | 3.3484878 |
| HELLS      | 1.4780855 | 1.724095 | 1.3162236 | 1.9640106 | 2.0179173 |
| HMMR       | 3.601786  | 2.333873 | 2.9900392 | 2.7985331 | 3.0090259 |
| KIAA0101   | 3.06985   | 2.165673 | 2.5075124 | 3.5304685 | 1.8241483 |
| KIF11      | 1.782614  | 2.55194  | 2.4637236 | 2.7403372 | 2.1195404 |
| KIF14      | 2.613853  | 2.40131  | 3.4513603 | 2.6023249 | 2.4159658 |
| KIF23      | 3.880478  | 1.934646 | 2.6858734 | 3.0401416 | 3.0962976 |
| KIF2C      | 2.369108  | 2.030461 | 2.4964531 | 2.1822401 | 2.243311  |
| MAD2L1     | 2.549783  | 2.089006 | 2.2477245 | 1.6970916 | 1.7820331 |
| MCM4       | 1.100063  | 1.722287 | 1.5847566 | 1.8338984 | 1.4544475 |
| MCM6       | 1.586613  | 0.98913  | 1.0929989 | 1.6414528 | 1.2283414 |
| MKI67      | 2.174624  | 1.982597 | 2.2528588 | 4.4259125 | 2.3905061 |
| NCAPH      | 2.212522  | 1.587435 | 2.0004828 | 3.5447868 | 3.022846  |
| NDC80      | 2.373855  | 2.481798 | 3.7940561 | 2.9485379 | 2.2488158 |
| NEK2       | 3.253339  | 3.686941 | 2.5192857 | 2.1410378 | 2.1331192 |
| NUSAP1     | 2.865943  | 2.822654 | 3.0859718 | 3.5900072 | 3.6111257 |
| PBK        | 4.926901  | 3.314425 | 4.0682591 | 4.1464874 | 3.0812362 |

|        |          |          |           |           |           |
|--------|----------|----------|-----------|-----------|-----------|
| POLE2  | 1.00793  | 1.457533 | 2.1860227 | 2.4314599 | 2.1090108 |
| PRC1   | 1.459825 | 2.710694 | 3.3092053 | 3.256522  | 3.160202  |
| RAD51  | 1.481896 | 2.220105 | 1.0901954 | 2.1899965 | 1.8388686 |
| RAD54L | 1.182757 | 1.840828 | 1.5110594 | 1.0058979 | 1.9481534 |
| SMC4   | 1.828578 | 1.130175 | 1.4330523 | 2.0178649 | 1.5570346 |
| TPX2   | 2.721865 | 2.911223 | 4.0280186 | 4.3894214 | 2.7885271 |
| TRIP13 | 1.583707 | 3.313628 | 3.3736047 | 3.012225  | 2.7134467 |
| TTK    | 3.596659 | 2.481306 | 3.5385101 | 3.3480037 | 2.4721329 |
| TYMS   | 1.952929 | 2.40001  | 3.3449321 | 2.4922739 | 2.167154  |
| UBE2C  | 1.871799 | 2.344126 | 3.597978  | 2.8941807 | 3.2683942 |
| UBE2T  | 1.702408 | 1.712369 | 2.3860268 | 2.3266844 | 2.1628955 |
| UHRF1  | 2.26861  | 4.071723 | 4.200046  | 3.4860135 | 2.967154  |
| WDHD1  | 2.365355 | 1.878088 | 1.8920953 | 1.7902375 | 1.6990958 |
| ZWILCH | 1.671318 | 1.490308 | 1.5934354 | 1.8585233 | 2.0443023 |

# Figure S1

A

TG

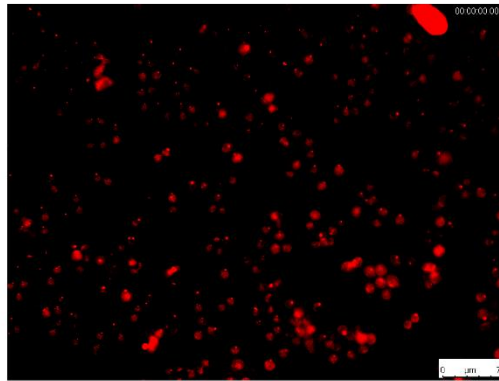

DAPI

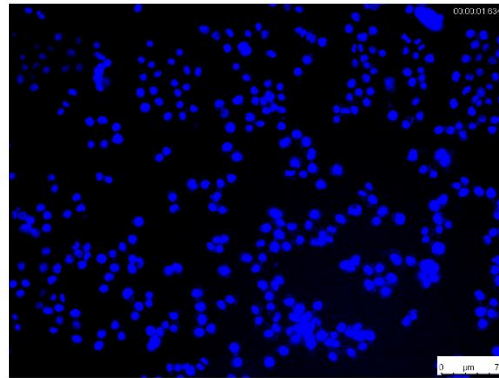

Merge

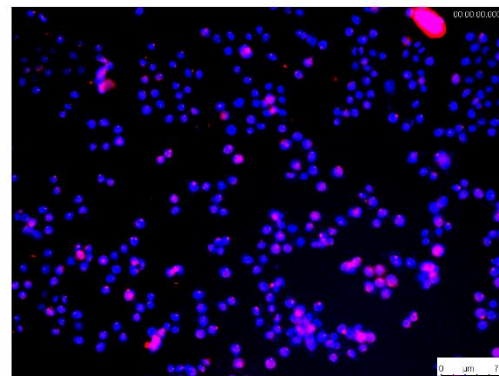

**Figure S1.** (A) Thyroglobulin (TG) expression was detected by immunofluorescence. The red fluorescence represents TG expression, and the blue fluorescence represents nuclei.

**Figure S2** the flowchart of the work

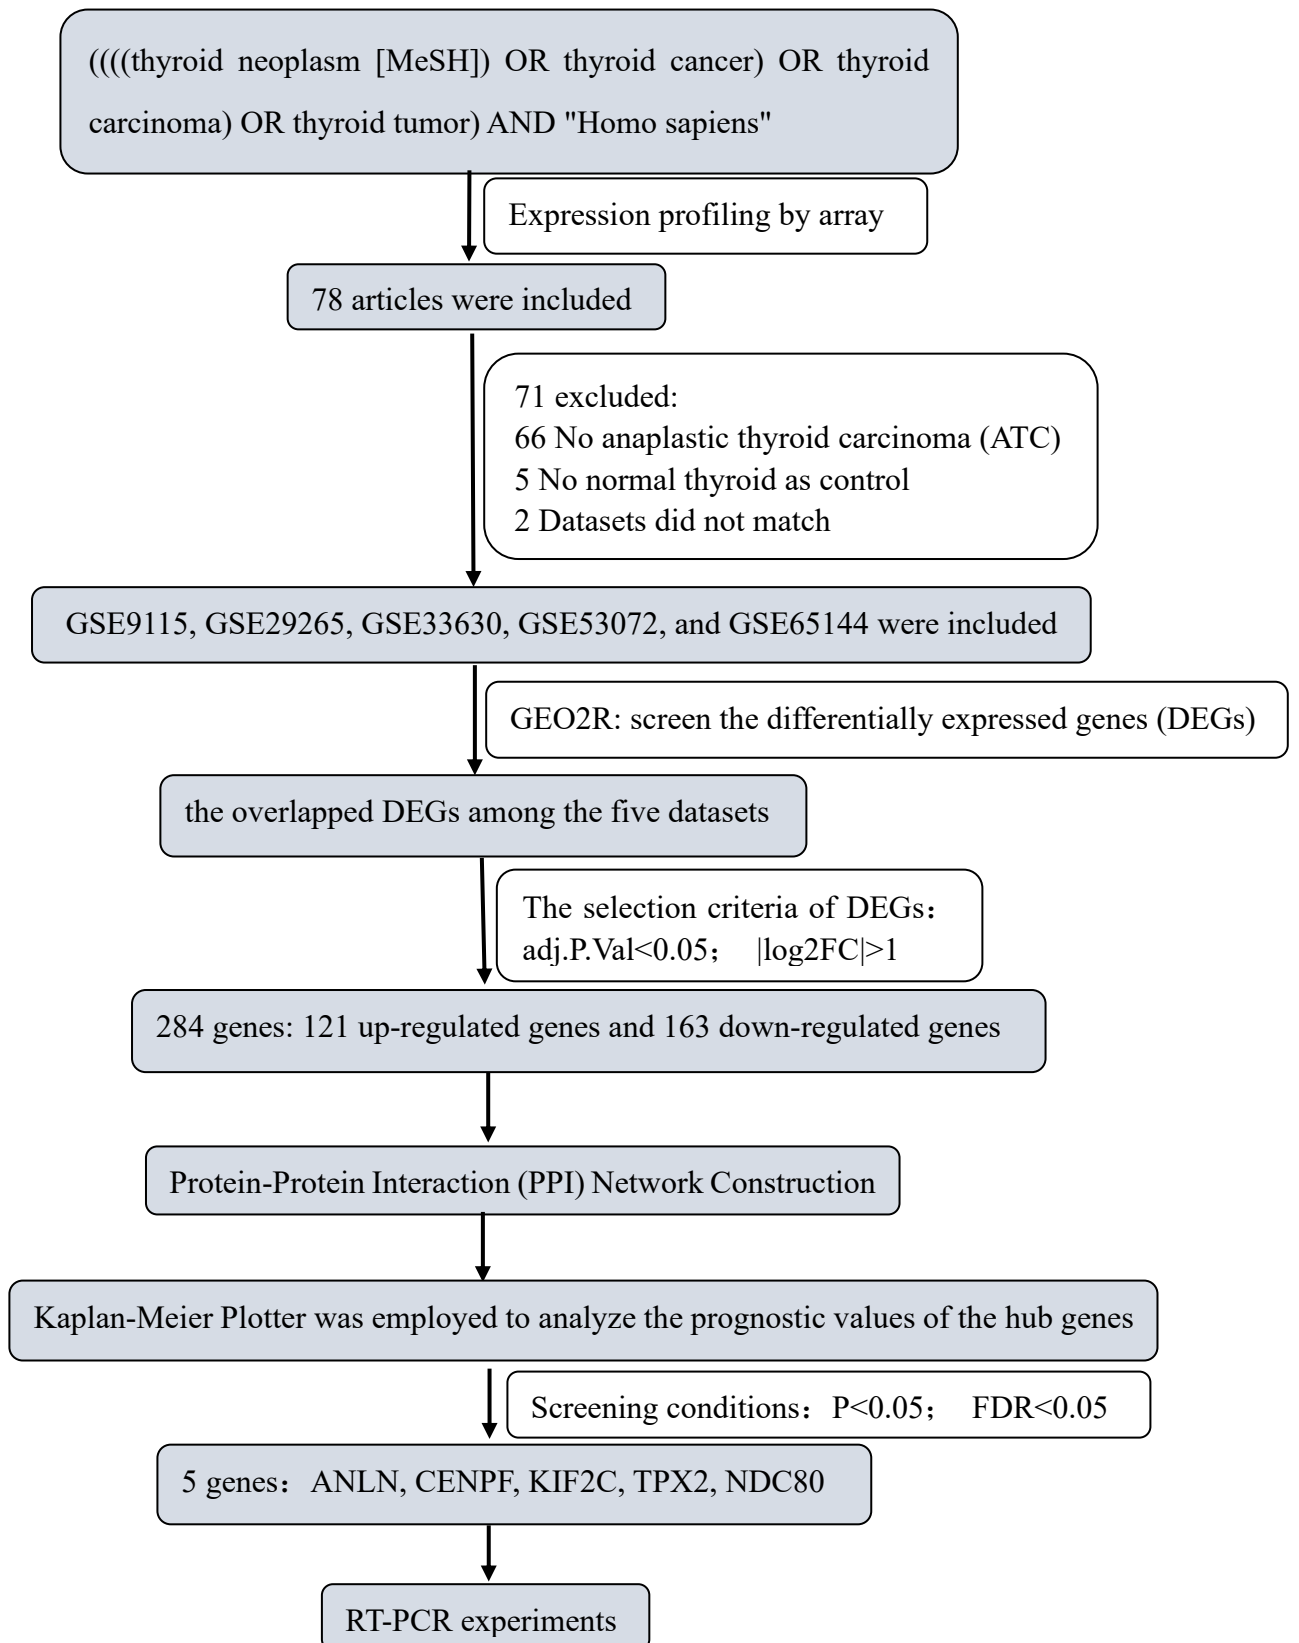



**Figure S3**

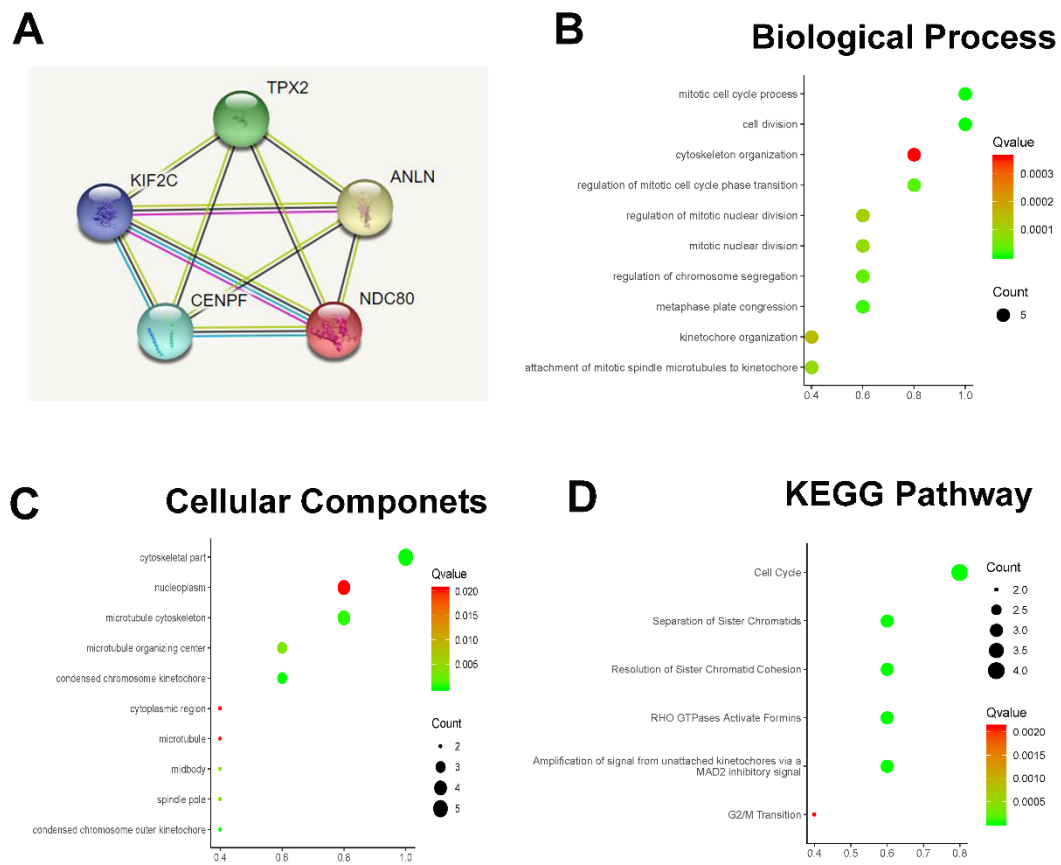

**Figure S3. Functional and pathway enrichment analyses of the five genes in ATC**

(A) PPI network of the five genes. (B) Biological Process (BP), (C) Cellular Component (CC), (D) and KEGG pathway analyses. The x-axis represents the Q value, and the y-axis represents the GO term. The GO terms were measured by the rich factor, Q value, and number of genes enriched.
